# Supplementary material
Source: publisher figshare collection journal article supplement (https://frontiersin.figshare.com/ndownloader/files/31321030)
Supplement: Supplementary file 1 [file 31321030]

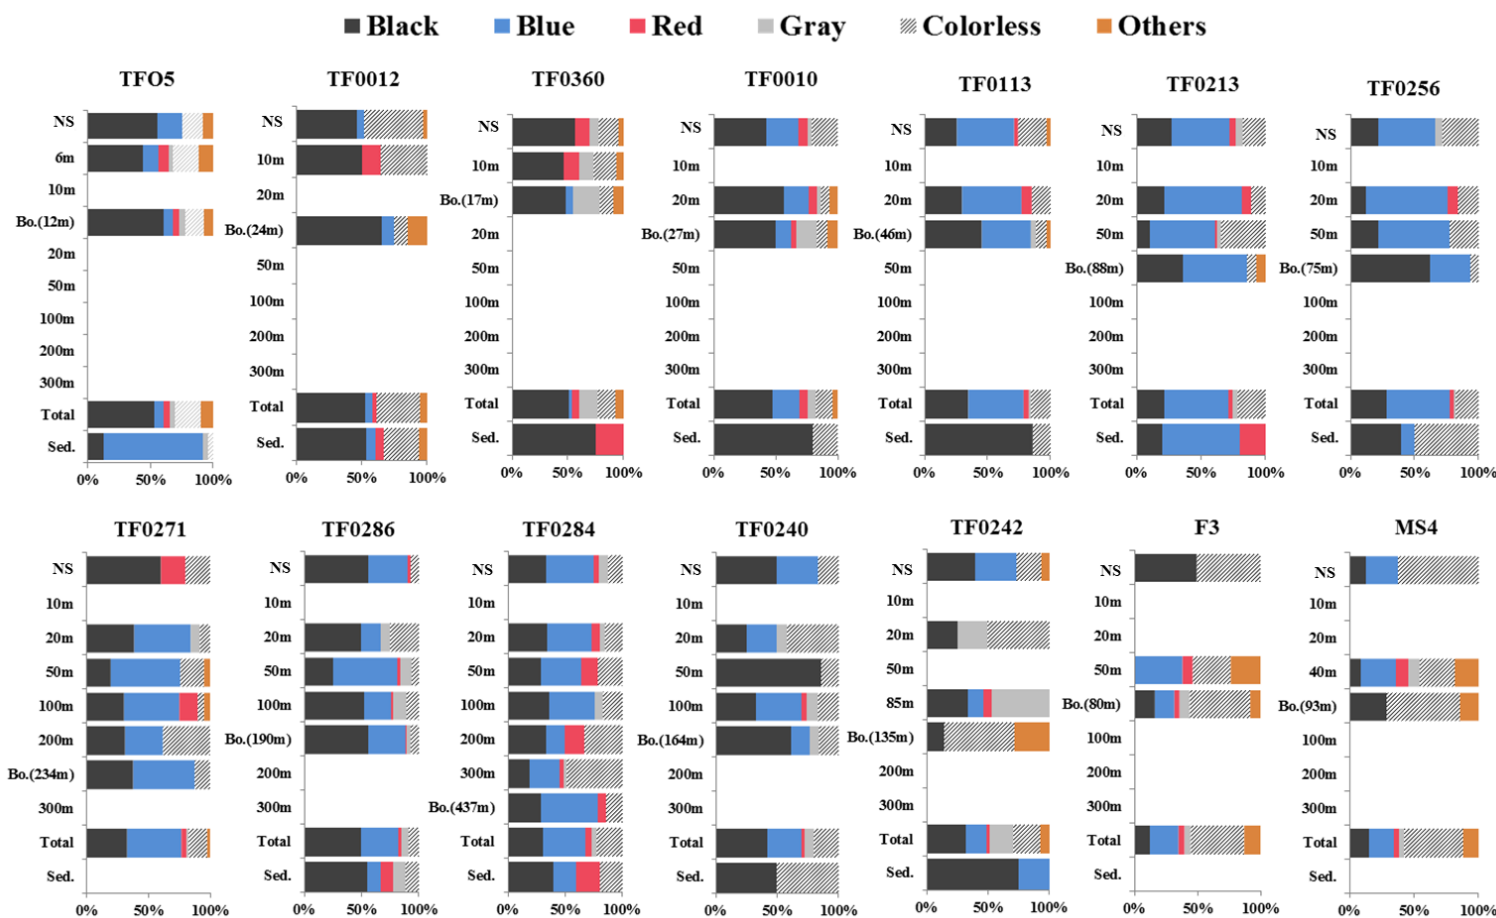

**Figure S2** Color-percentages of the microplastics in the water layers and the surface sediments collected from the Baltic Sea. ‘NS’, near surface; ‘Bo.’, near bottom layer; ‘Sed.’, sediment. Some depths in this figure did not show any data because no samples were collected at that depth in the corresponding station.
